# Supplementary material
Source: publisher site journal article supplement (https://www.dovepress.com/article/335073)
Supplement: Supplementary file 1 [file get_supplementary_file.php]

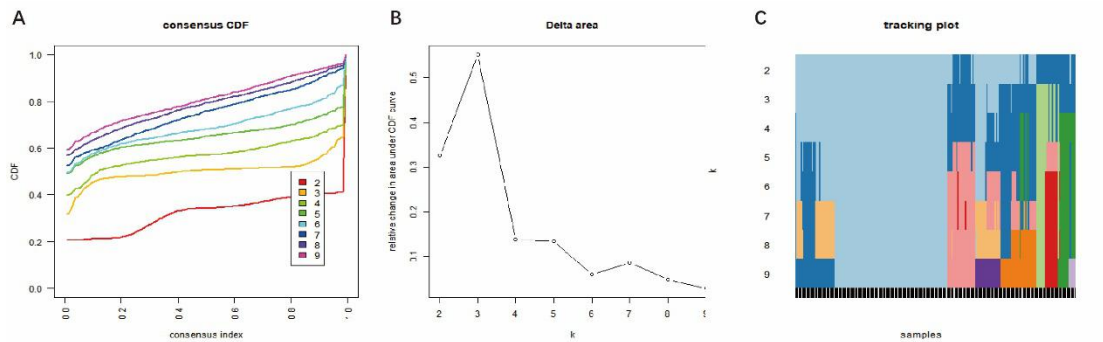

**Figure S1. Unsupervised consensus clustering by pyroptosis-related lncRNAs.** (A) Consensus clustering cumulative distribution function (CDF) for  $k=2$  to 9. (B) Relative change in area under the CDF curve for  $k=2$  to 9. (C) Tracking plot for  $k=2$  to 9.

**Table S1: List of 33 pyroptosis-related genes**

| pyroptosis-related genes |
|--------------------------|
| AIM2                     |
| CASP1                    |
| CASP3                    |
| CASP4                    |
| CASP5                    |
| CASP6                    |
| CASP8                    |
| CASP9                    |
| ELANE                    |
| GPX4                     |
| GSDMA                    |
| GSDMB                    |
| GSDMC                    |
| GSDMD                    |
| GSDME                    |
| IL18                     |
| IL1B                     |
| IL6                      |
| NLR4                     |
| NLRP1                    |
| NLRP2                    |
| NLRP3                    |
| NLRP6                    |
| NLRP7                    |
| NOD1                     |
| NOD2                     |
| PJVK                     |
| PLCG1                    |
| PRKACA                   |
| PYCARD                   |
| SCAF11                   |
| TIRAP                    |
| TNF                      |

**Table S2: Correlations between 20 pyroptosis-related genes and 166 pyroptosis-related lncRNAs.**

| pyroptosis-related gene | lncRNA     | cor         | pvalue   | Regulation |
|-------------------------|------------|-------------|----------|------------|
| IL18                    | LINC02481  | 0.547539083 | 5.66E-22 | postive    |
| PJVK                    | AP006621.3 | 0.511171553 | 6.54E-19 | postive    |
| CASP5                   | LINC02195  | 0.549902835 | 3.47E-22 | postive    |
| CASP1                   | USP30-AS1  | 0.721016681 | 1.79E-43 | postive    |
| CASP4                   | USP30-AS1  | 0.543727953 | 1.23E-21 | postive    |
| CASP5                   | USP30-AS1  | 0.596793651 | 9.11E-27 | postive    |
| IL18                    | USP30-AS1  | 0.593488384 | 2.03E-26 | postive    |
| NLRC4                   | USP30-AS1  | 0.520332346 | 1.20E-19 | postive    |
| PYCARD                  | USP30-AS1  | 0.502427694 | 3.15E-18 | postive    |
| TIRAP                   | CCDC84-DT  | 0.501852637 | 3.49E-18 | postive    |
| CASP1                   | MIR223HG   | 0.645827797 | 1.96E-32 | postive    |
| CASP4                   | MIR223HG   | 0.550882798 | 2.83E-22 | postive    |
| IL18                    | MIR223HG   | 0.576924366 | 9.79E-25 | postive    |
| NLRC4                   | MIR223HG   | 0.721144846 | 1.70E-43 | postive    |
| NLRP3                   | MIR223HG   | 0.643979321 | 3.34E-32 | postive    |
| PYCARD                  | MIR223HG   | 0.571571506 | 3.27E-24 | postive    |
| SCAF11                  | AC025031.1 | 0.571559236 | 3.28E-24 | postive    |
| PYCARD                  | AC244090.1 | 0.575611744 | 1.32E-24 | postive    |
| PYCARD                  | SCOC-AS1   | 0.526732432 | 3.55E-20 | postive    |
| GSDMA                   | AL355607.2 | 0.548156571 | 4.98E-22 | postive    |
| CASP1                   | AC103760.1 | 0.527567086 | 3.02E-20 | postive    |
| NLRC4                   | AC103760.1 | 0.634201299 | 5.35E-31 | postive    |
| GSDMC                   | AL035665.1 | 0.537253454 | 4.54E-21 | postive    |
| NLRP2                   | BX284668.6 | 0.596701102 | 9.32E-27 | postive    |
| GSDMA                   | HOMER3-AS1 | 0.504728776 | 2.09E-18 | postive    |
| NLRC4                   | HOMER3-AS1 | 0.524089807 | 5.88E-20 | postive    |
| CASP4                   | LINC02611  | 0.51184167  | 5.78E-19 | postive    |
| CASP5                   | LINC02611  | 0.58595613  | 1.22E-25 | postive    |
| GSDMA                   | LINC02611  | 0.602988051 | 1.98E-27 | postive    |
| NLRC4                   | LINC02611  | 0.605215177 | 1.14E-27 | postive    |
| PYCARD                  | LINC02611  | 0.645888699 | 1.92E-32 | postive    |
| GSDMC                   | LINC00520  | 0.511090848 | 6.64E-19 | postive    |
| PYCARD                  | AL445524.1 | 0.512168508 | 5.45E-19 | postive    |
| CASP1                   | IRF1-AS1   | 0.611107504 | 2.55E-28 | postive    |
| NLRC4                   | AC245128.3 | 0.677351144 | 1.16E-36 | postive    |
| IL1B                    | AC002480.1 | 0.50934967  | 9.11E-19 | postive    |
| IL6                     | IL6-AS1    | 0.598131211 | 6.58E-27 | postive    |
| CASP1                   | AC022182.2 | 0.592016124 | 2.89E-26 | postive    |
| CASP4                   | AC022182.2 | 0.520066449 | 1.26E-19 | postive    |
| CASP5                   | AC022182.2 | 0.533715393 | 9.13E-21 | postive    |
| IL18                    | AC022182.2 | 0.561478957 | 3.00E-23 | postive    |
| NLRC4                   | AC022182.2 | 0.612866233 | 1.62E-28 | postive    |
| PYCARD                  | AC022182.2 | 0.570769666 | 3.91E-24 | postive    |
| ELANE                   | LINC02288  | 0.500410225 | 4.50E-18 | postive    |
| CASP1                   | LINC02273  | 0.504991094 | 2.00E-18 | postive    |
| IL18                    | LINC02273  | 0.531481158 | 1.41E-20 | postive    |
| PYCARD                  | LINC01357  | 0.61490755  | 9.58E-29 | postive    |
| CASP1                   | AC138207.5 | 0.715789352 | 1.36E-42 | postive    |
| CASP4                   | AC138207.5 | 0.574583136 | 1.66E-24 | postive    |
| CASP5                   | AC138207.5 | 0.611015256 | 2.61E-28 | postive    |
| IL18                    | AC138207.5 | 0.680781019 | 3.72E-37 | postive    |
| NLRC4                   | AC138207.5 | 0.817717023 | 1.50E-64 | postive    |
| NLRP3                   | AC138207.5 | 0.614906423 | 9.58E-29 | postive    |

|        |             |              |                   |
|--------|-------------|--------------|-------------------|
| NLRC4  | C9orf139    | 0. 533313405 | 9. 88E-21 postive |
| PYCARD | C9orf139    | 0. 679343242 | 6. 00E-37 postive |
| CASP1  | AL357033. 4 | 0. 663884008 | 8. 56E-35 postive |
| CASP4  | AL357033. 4 | 0. 516408021 | 2. 49E-19 postive |
| IL18   | AL357033. 4 | 0. 674003167 | 3. 44E-36 postive |
| NLRC4  | AL357033. 4 | 0. 636063728 | 3. 18E-31 postive |
| PYCARD | AL357033. 4 | 0. 576225705 | 1. 15E-24 postive |
| CASP1  | LINC02285   | 0. 591677778 | 3. 13E-26 postive |
| CASP5  | LINC02285   | 0. 504108984 | 2. 34E-18 postive |
| IL18   | LINC02285   | 0. 571122236 | 3. 61E-24 postive |
| NLRC4  | LINC02285   | 0. 706796135 | 4. 05E-41 postive |
| NLRP3  | LINC02285   | 0. 532041903 | 1. 27E-20 postive |
| PYCARD | LINC02285   | 0. 679751316 | 5. 24E-37 postive |
| PYCARD | AC002059. 1 | 0. 585900108 | 1. 23E-25 postive |
| NLRP2  | AC012462. 3 | 0. 51174397  | 5. 89E-19 postive |
| CASP1  | AC012645. 3 | 0. 668258336 | 2. 17E-35 postive |
| IL18   | AC012645. 3 | 0. 767871554 | 2. 12E-52 postive |
| NLRC4  | AC012645. 3 | 0. 524740078 | 5. 20E-20 postive |
| PYCARD | AC012645. 3 | 0. 545288553 | 8. 98E-22 postive |
| CASP1  | AC002091. 1 | 0. 577888446 | 7. 86E-25 postive |
| CASP4  | AC002091. 1 | 0. 523128471 | 7. 06E-20 postive |
| IL18   | AC002091. 1 | 0. 59973485  | 4. 44E-27 postive |
| NLRC4  | AC002091. 1 | 0. 656742568 | 7. 67E-34 postive |
| NLRP3  | AC002091. 1 | 0. 676311154 | 1. 63E-36 postive |
| CASP1  | AC079015. 1 | 0. 679970914 | 4. 87E-37 postive |
| IL18   | AC079015. 1 | 0. 69648457  | 1. 70E-39 postive |
| NLRC4  | AC079015. 1 | 0. 538820784 | 3. 32E-21 postive |
| PYCARD | AC079015. 1 | 0. 512706616 | 4. 94E-19 postive |
| CASP1  | IL10RB-DT   | 0. 504067418 | 2. 36E-18 postive |
| CASP4  | IL10RB-DT   | 0. 516350453 | 2. 52E-19 postive |
| CASP5  | IL10RB-DT   | 0. 588915014 | 6. 05E-26 postive |
| IL18   | IL10RB-DT   | 0. 501860542 | 3. 49E-18 postive |
| NLRC4  | IL10RB-DT   | 0. 699635075 | 5. 51E-40 postive |
| PYCARD | IL10RB-DT   | 0. 639870979 | 1. 08E-31 postive |
| PYCARD | CACNA1C-AS2 | 0. 521489071 | 9. 63E-20 postive |
| CASP1  | U62317. 4   | 0. 580187641 | 4. 64E-25 postive |
| CASP5  | U62317. 4   | 0. 572283755 | 2. 79E-24 postive |
| IL18   | U62317. 4   | 0. 528148465 | 2. 70E-20 postive |
| NLRC4  | U62317. 4   | 0. 583826484 | 2. 00E-25 postive |
| PYCARD | U62317. 4   | 0. 651852215 | 3. 33E-33 postive |
| CASP1  | AC108134. 3 | 0. 589876445 | 4. 82E-26 postive |
| CASP4  | AC108134. 3 | 0. 521945144 | 8. 83E-20 postive |
| NLRC4  | AC108134. 3 | 0. 571495092 | 3. 33E-24 postive |
| NLRP3  | AC108134. 3 | 0. 505919566 | 1. 69E-18 postive |
| PYCARD | AC108134. 3 | 0. 550599311 | 3. 00E-22 postive |
| CASP1  | AC006369. 1 | 0. 563149152 | 2. 09E-23 postive |
| IL18   | AC006369. 1 | 0. 590710115 | 3. 95E-26 postive |
| CASP1  | PSMB8-AS1   | 0. 740037786 | 7. 27E-47 postive |
| CASP4  | PSMB8-AS1   | 0. 507860114 | 1. 19E-18 postive |
| IL18   | PSMB8-AS1   | 0. 532188017 | 1. 23E-20 postive |
| NLRC4  | LINC02766   | 0. 513431194 | 4. 32E-19 postive |
| NLRP6  | TONSL-AS1   | 0. 500576286 | 4. 37E-18 postive |
| NLRP2  | AC005332. 1 | 0. 697406786 | 1. 22E-39 postive |
| GSDMA  | AC113346. 1 | 0. 520412374 | 1. 18E-19 postive |

|        |             |              |                   |
|--------|-------------|--------------|-------------------|
| GSDMD  | LINC01871   | 0. 519568242 | 1. 38E-19 postive |
| IL18   | LINC01871   | 0. 637332026 | 2. 22E-31 postive |
| NLRC4  | LINC01871   | 0. 535653483 | 6. 23E-21 postive |
| PYCARD | LINC01871   | 0. 562618544 | 2. 34E-23 postive |
| TIRAP  | AP003486. 1 | 0. 526690138 | 3. 58E-20 postive |
| CASP1  | AL391832. 3 | 0. 536165371 | 5. 63E-21 postive |
| NLRC4  | AL391832. 3 | 0. 552654227 | 1. 96E-22 postive |
| NLRP3  | AL391832. 3 | 0. 526879123 | 3. 45E-20 postive |
| NOD1   | GARS1-DT    | 0. 584218522 | 1. 83E-25 postive |
| CASP1  | LINC00861   | 0. 523901521 | 6. 10E-20 postive |
| IL18   | LINC00861   | 0. 600455733 | 3. 71E-27 postive |
| IL18   | AC002091. 2 | 0. 562121704 | 2. 61E-23 postive |
| NLRC4  | AC002091. 2 | 0. 508920694 | 9. 84E-19 postive |
| NLRP3  | AC002091. 2 | 0. 663686901 | 9. 10E-35 postive |
| CASP1  | AC007728. 2 | 0. 513185997 | 4. 52E-19 postive |
| NOD2   | AC007728. 2 | 0. 539306658 | 3. 01E-21 postive |
| NLRP6  | OBSCN-AS1   | 0. 50300963  | 2. 84E-18 postive |
| CASP1  | AL133371. 2 | 0. 689434316 | 1. 99E-38 postive |
| CASP4  | AL133371. 2 | 0. 564880463 | 1. 43E-23 postive |
| GSDMA  | AL133371. 2 | 0. 539075657 | 3. 15E-21 postive |
| IL18   | AL133371. 2 | 0. 653952531 | 1. 78E-33 postive |
| NLRC4  | AL133371. 2 | 0. 744963733 | 8. 60E-48 postive |
| NLRP3  | AL133371. 2 | 0. 742228824 | 2. 83E-47 postive |
| PYCARD | AL133371. 2 | 0. 568307185 | 6. 75E-24 postive |
| TIRAP  | AP000907. 2 | 0. 502504305 | 3. 11E-18 postive |
| NLRP2  | AC112907. 3 | 0. 527557398 | 3. 03E-20 postive |
| PYCARD | AC008915. 3 | 0. 503085556 | 2. 81E-18 postive |
| GSDMA  | AC027319. 1 | 0. 563831582 | 1. 80E-23 postive |
| PYCARD | AC027319. 1 | 0. 513006506 | 4. 67E-19 postive |
| NLRP6  | AC022081. 1 | 0. 525527746 | 4. 47E-20 postive |
| NLRC4  | AC011899. 2 | 0. 670106261 | 1. 20E-35 postive |
| NLRP3  | AC011899. 2 | 0. 52971434  | 1. 99E-20 postive |
| PYCARD | AC011899. 2 | 0. 506008277 | 1. 66E-18 postive |
| CASP1  | AC015911. 3 | 0. 592414822 | 2. 63E-26 postive |
| IL18   | AC015911. 3 | 0. 604077343 | 1. 51E-27 postive |
| CASP1  | TRG-AS1     | 0. 590808154 | 3. 86E-26 postive |
| IL18   | TRG-AS1     | 0. 667375173 | 2. 87E-35 postive |
| CASP1  | ANKRD44-AS1 | 0. 60322312  | 1. 87E-27 postive |
| IL18   | ANKRD44-AS1 | 0. 596677883 | 9. 38E-27 postive |
| NLRC4  | ANKRD44-AS1 | 0. 535015548 | 7. 07E-21 postive |
| PYCARD | ANKRD44-AS1 | 0. 531142137 | 1. 51E-20 postive |
| NLRP2  | AL121658. 1 | 0. 682457764 | 2. 13E-37 postive |
| IL1B   | LINC02269   | 0. 667359194 | 2. 88E-35 postive |
| CASP1  | LINC01480   | 0. 63455761  | 4. 84E-31 postive |
| CASP4  | LINC01480   | 0. 529069702 | 2. 26E-20 postive |
| CASP5  | LINC01480   | 0. 534063868 | 8. 53E-21 postive |
| IL18   | LINC01480   | 0. 667360862 | 2. 88E-35 postive |
| NLRC4  | LINC01480   | 0. 59240849  | 2. 63E-26 postive |
| PYCARD | LINC01480   | 0. 624030699 | 8. 62E-30 postive |
| PYCARD | ENTPD3-AS1  | 0. 504155956 | 2. 32E-18 postive |
| NLRP3  | AC138207. 1 | 0. 508279248 | 1. 11E-18 postive |
| NLRC4  | AC083799. 1 | 0. 514466906 | 3. 57E-19 postive |
| CASP1  | C9orf139    | 0. 560988948 | 3. 33E-23 postive |
| IL18   | C9orf139    | 0. 563774356 | 1. 82E-23 postive |

|        |            |             |                  |
|--------|------------|-------------|------------------|
| NLRC4  | AL590764.1 | 0.682239208 | 2.29E-37 postive |
| PYCARD | AL590764.1 | 0.751033255 | 5.79E-49 postive |
| CASP1  | AL162414.1 | 0.593021198 | 2.27E-26 postive |
| IL18   | AL162414.1 | 0.597332115 | 7.99E-27 postive |
| NLRC4  | AL162414.1 | 0.539052156 | 3.17E-21 postive |
| CASP1  | AC009119.1 | 0.620249354 | 2.36E-29 postive |
| CASP4  | AC009119.1 | 0.504351686 | 2.24E-18 postive |
| CASP5  | AC009119.1 | 0.593685357 | 1.94E-26 postive |
| IL18   | AC009119.1 | 0.532388152 | 1.18E-20 postive |
| NLRC4  | AC009119.1 | 0.641379985 | 7.05E-32 postive |
| PYCARD | AC009119.1 | 0.650221867 | 5.40E-33 postive |
| PJVK   | AL031673.1 | 0.532515623 | 1.16E-20 postive |
| SCAF11 | PPFIA2-AS1 | 0.597819646 | 7.10E-27 postive |
| ELANE  | AC129507.1 | 0.613236811 | 1.48E-28 postive |
| PJVK   | AC026471.4 | 0.635370623 | 3.86E-31 postive |
| CASP1  | AP002954.1 | 0.524881015 | 5.06E-20 postive |
| GSDMA  | AP002954.1 | 0.505341387 | 1.88E-18 postive |
| NLRC4  | AP002954.1 | 0.644587567 | 2.80E-32 postive |
| NLRP3  | AP002954.1 | 0.506289612 | 1.58E-18 postive |
| PYCARD | AP002954.1 | 0.563772493 | 1.82E-23 postive |
| IL1B   | AC023421.1 | 0.573616672 | 2.07E-24 postive |
| PYCARD | LINCO2391  | 0.517288569 | 2.12E-19 postive |
| NLRC4  | LINCO1645  | 0.600325994 | 3.83E-27 postive |
| PJVK   | AL731533.2 | 0.533079465 | 1.03E-20 postive |
| CASP1  | TNRC6C-AS1 | 0.540489091 | 2.37E-21 postive |
| IL18   | TNRC6C-AS1 | 0.621348992 | 1.76E-29 postive |
| NLRC4  | TNRC6C-AS1 | 0.506376613 | 1.56E-18 postive |
| CASP1  | AC018755.4 | 0.679791117 | 5.17E-37 postive |
| CASP4  | AC018755.4 | 0.522720941 | 7.63E-20 postive |
| CASP5  | AC018755.4 | 0.53290787  | 1.07E-20 postive |
| IL18   | AC018755.4 | 0.624199007 | 8.24E-30 postive |
| NLRC4  | AC018755.4 | 0.760647538 | 6.85E-51 postive |
| NLRP3  | AC018755.4 | 0.550970435 | 2.78E-22 postive |
| PYCARD | AC018755.4 | 0.680947915 | 3.52E-37 postive |
| NOD1   | CAPS2-AS1  | 0.514358327 | 3.64E-19 postive |
| SCAF11 | CAPS2-AS1  | 0.661158994 | 1.99E-34 postive |
| GSDMC  | AL031674.1 | 0.553739675 | 1.56E-22 postive |
| PJVK   | PARD3-AS1  | 0.535689593 | 6.19E-21 postive |
| NLRC4  | AC009831.3 | 0.504871914 | 2.04E-18 postive |
| PYCARD | AC009831.3 | 0.591547679 | 3.23E-26 postive |
| NLRC4  | AC011899.3 | 0.565026792 | 1.39E-23 postive |
| CASP1  | LINCO2528  | 0.511354088 | 6.32E-19 postive |
| GSDMA  | AC131956.2 | 0.506019471 | 1.66E-18 postive |
| CASP5  | SMIM25     | 0.514147574 | 3.79E-19 postive |
| GSDMA  | SMIM25     | 0.587387759 | 8.68E-26 postive |
| NLRC4  | SMIM25     | 0.558560928 | 5.61E-23 postive |
| PYCARD | SMIM25     | 0.517804197 | 1.92E-19 postive |
| CASP4  | AC147067.1 | 0.540800325 | 2.23E-21 postive |
| CASP1  | LINCO2773  | 0.5725502   | 2.63E-24 postive |
| NLRC4  | LINCO2773  | 0.518651589 | 1.64E-19 postive |
| NLRP6  | LINCO2870  | 0.529216658 | 2.20E-20 postive |
| CASP1  | LINCO1871  | 0.667138748 | 3.09E-35 postive |
| CASP4  | LINCO1871  | 0.538498082 | 3.54E-21 postive |
| CASP5  | LINCO1871  | 0.626588304 | 4.32E-30 postive |

|        |             |               |                    |
|--------|-------------|---------------|--------------------|
| PYCARD | AC138207. 5 | 0. 74712907   | 3. 31E-48 postive  |
| CASP1  | AC006033. 2 | 0. 506320203  | 1. 57E-18 postive  |
| IL18   | AC006033. 2 | 0. 52021886   | 1. 22E-19 postive  |
| NLRC4  | AC006033. 2 | 0. 514061674  | 3. 85E-19 postive  |
| CASP1  | AC110995. 1 | 0. 520098881  | 1. 25E-19 postive  |
| CASP4  | AC110995. 1 | 0. 509843011  | 8. 33E-19 postive  |
| NLRC4  | AC110995. 1 | 0. 672297351  | 5. 97E-36 postive  |
| PYCARD | AC110995. 1 | 0. 511909292  | 5. 71E-19 postive  |
| CASP1  | LINC01150   | 0. 587016752  | 9. 47E-26 postive  |
| IL18   | LINC01150   | 0. 588185474  | 7. 19E-26 postive  |
| NLRC4  | LINC01150   | 0. 62833939   | 2. 69E-30 postive  |
| NLRP3  | LINC01150   | 0. 768741282  | 1. 38E-52 postive  |
| PYCARD | LINC01150   | 0. 514936305  | 3. 27E-19 postive  |
| CASP1  | NCK1-DT     | 0. 700078083  | 4. 70E-40 postive  |
| CASP4  | NCK1-DT     | 0. 55697883   | 7. 85E-23 postive  |
| CASP5  | NCK1-DT     | 0. 533933369  | 8. 75E-21 postive  |
| IL18   | NCK1-DT     | 0. 620276562  | 2. 34E-29 postive  |
| NLRC4  | NCK1-DT     | 0. 539466725  | 2. 92E-21 postive  |
| PYCARD | NCK1-DT     | 0. 547966999  | 5. 18E-22 postive  |
| NOD1   | AC005013. 1 | 0. 535832739  | 6. 01E-21 postive  |
| PJVK   | ZNF337-AS1  | 0. 535319695  | 6. 66E-21 postive  |
| CASP1  | PCED1B-AS1  | 0. 745988717  | 5. 48E-48 postive  |
| CASP4  | PCED1B-AS1  | 0. 610791121  | 2. 77E-28 postive  |
| CASP5  | PCED1B-AS1  | 0. 645179512  | 2. 36E-32 postive  |
| GSDMA  | PCED1B-AS1  | 0. 536281197  | 5. 50E-21 postive  |
| IL18   | PCED1B-AS1  | 0. 752255326  | 3. 33E-49 postive  |
| NLRC4  | PCED1B-AS1  | 0. 709166005  | 1. 68E-41 postive  |
| NLRP3  | PCED1B-AS1  | 0. 53393816   | 8. 74E-21 postive  |
| PYCARD | PCED1B-AS1  | 0. 693971739  | 4. 11E-39 postive  |
| TIRAP  | AP001318. 2 | 0. 625483526  | 5. 83E-30 postive  |
| PYCARD | AC005288. 1 | -0. 521607336 | 9. 42E-20 negative |
| NLRC4  | AC006272. 1 | 0. 50561386   | 1. 79E-18 postive  |
| PYCARD | AC069281. 2 | 0. 560614067  | 3. 61E-23 postive  |
| IL1B   | LINC00973   | 0. 579790437  | 5. 08E-25 postive  |
| GSDMA  | GAPLINC     | 0. 586163207  | 1. 16E-25 postive  |
| CASP1  | U62317. 1   | 0. 677862979  | 9. 78E-37 postive  |
| CASP4  | U62317. 1   | 0. 507952096  | 1. 17E-18 postive  |
| CASP5  | U62317. 1   | 0. 680485797  | 4. 11E-37 postive  |
| GSDMD  | U62317. 1   | 0. 532905315  | 1. 07E-20 postive  |
| IL18   | U62317. 1   | 0. 594154213  | 1. 73E-26 postive  |
| NLRC4  | U62317. 1   | 0. 596122279  | 1. 07E-26 postive  |
| PYCARD | U62317. 1   | 0. 606082137  | 9. 14E-28 postive  |
| NLRP3  | LINC02705   | 0. 552254514  | 2. 13E-22 postive  |
| CASP1  | CEP250-AS1  | 0. 679061776  | 6. 59E-37 postive  |
| CASP4  | CEP250-AS1  | 0. 587137783  | 9. 21E-26 postive  |
| CASP5  | CEP250-AS1  | 0. 581772335  | 3. 22E-25 postive  |
| IL18   | CEP250-AS1  | 0. 661611066  | 1. 73E-34 postive  |
| NLRC4  | CEP250-AS1  | 0. 756902319  | 3. 95E-50 postive  |
| PYCARD | CEP250-AS1  | 0. 744199571  | 1. 20E-47 postive  |
| CASP1  | AL590764. 1 | 0. 707270134  | 3. 40E-41 postive  |
| CASP4  | AL590764. 1 | 0. 571091614  | 3. 64E-24 postive  |
| CASP5  | AL590764. 1 | 0. 635932883  | 3. 30E-31 postive  |
| GSDMA  | AL590764. 1 | 0. 559495669  | 4. 59E-23 postive  |
| IL18   | AL590764. 1 | 0. 716735528  | 9. 47E-43 postive  |

|        |             |              |                   |
|--------|-------------|--------------|-------------------|
| PYCARD | AC242842. 1 | 0. 53255029  | 1. 15E-20 postive |
| ELANE  | LINC02289   | 0. 597042675 | 8. 58E-27 postive |
| SCAF11 | AC007255. 1 | 0. 51091901  | 6. 85E-19 postive |
| PYCARD | AC020658. 5 | 0. 591567107 | 3. 22E-26 postive |
| CASP1  | ITGB2-AS1   | 0. 604903004 | 1. 23E-27 postive |
| IL18   | ITGB2-AS1   | 0. 641547375 | 6. 72E-32 postive |
| PYCARD | AC005840. 4 | 0. 569114773 | 5. 65E-24 postive |
| CASP1  | IL6R-AS1    | 0. 543464862 | 1. 30E-21 postive |
| NLRC4  | IL6R-AS1    | 0. 579162954 | 5. 87E-25 postive |
| PYCARD | IL6R-AS1    | 0. 525171803 | 4. 78E-20 postive |
| IL18   | LINC00996   | 0. 605646135 | 1. 02E-27 postive |
| NLRP3  | AC090559. 1 | 0. 718919438 | 4. 06E-43 postive |
| CASP1  | LINC00892   | 0. 548925907 | 4. 25E-22 postive |
| IL18   | LINC00892   | 0. 533557101 | 9. 42E-21 postive |
| SCAF11 | AC034213. 1 | 0. 507823997 | 1. 20E-18 postive |
| CASP1  | AC015819. 1 | 0. 662330838 | 1. 39E-34 postive |
| CASP4  | AC015819. 1 | 0. 579677726 | 5. 22E-25 postive |
| CASP5  | AC015819. 1 | 0. 592147636 | 2. 80E-26 postive |
| GSDMA  | AC015819. 1 | 0. 538920124 | 3. 25E-21 postive |
| IL18   | AC015819. 1 | 0. 675596924 | 2. 05E-36 postive |
| NLRC4  | AC015819. 1 | 0. 658454033 | 4. 56E-34 postive |
| PYCARD | AC015819. 1 | 0. 650614632 | 4. 80E-33 postive |
| CASP1  | CARD8-AS1   | 0. 57664394  | 1. 04E-24 postive |
| CASP4  | CARD8-AS1   | 0. 587347713 | 8. 76E-26 postive |
| IL18   | CARD8-AS1   | 0. 572566597 | 2. 62E-24 postive |
| NLRC4  | CARD8-AS1   | 0. 670067131 | 1. 22E-35 postive |
| NLRP3  | CARD8-AS1   | 0. 530847327 | 1. 60E-20 postive |
| TIRAP  | AP003392. 1 | 0. 54859044  | 4. 55E-22 postive |
| CASP1  | AL135818. 1 | 0. 536327079 | 5. 45E-21 postive |
| CASP5  | AC124248. 1 | 0. 519519978 | 1. 39E-19 postive |
| NLRC4  | AC124248. 1 | 0. 553155267 | 1. 76E-22 postive |
| PYCARD | AC124248. 1 | 0. 609874042 | 3. 50E-28 postive |
| NLRC4  | AC084064. 1 | 0. 536756988 | 5. 01E-21 postive |
| NLRC4  | DNMBP-AS1   | 0. 554540948 | 1. 32E-22 postive |
| IL18   | MACORIS     | 0. 509097536 | 9. 53E-19 postive |
| NLRP3  | MACORIS     | 0. 562467251 | 2. 42E-23 postive |
| PYCARD | MACORIS     | 0. 506752133 | 1. 46E-18 postive |
| IL18   | AC004585. 1 | 0. 537911392 | 3. 98E-21 postive |
| CASP1  | AC127521. 1 | 0. 536414788 | 5. 36E-21 postive |
| IL18   | AC127521. 1 | 0. 607602655 | 6. 23E-28 postive |
| CASP1  | LINC01678   | 0. 543021755 | 1. 42E-21 postive |
| CASP5  | LINC01678   | 0. 511800653 | 5. 83E-19 postive |
| NLRC4  | LINC01678   | 0. 7584598   | 1. 91E-50 postive |
| NLRP3  | LINC01678   | 0. 591204585 | 3. 51E-26 postive |
| PYCARD | LINC01678   | 0. 571687352 | 3. 19E-24 postive |
| CASP1  | AC005632. 3 | 0. 516527029 | 2. 44E-19 postive |
| IL18   | AC005632. 3 | 0. 540780564 | 2. 24E-21 postive |
| NLRC4  | AC005632. 3 | 0. 516883496 | 2. 28E-19 postive |
| NLRP2  | AC026369. 3 | 0. 661505651 | 1. 79E-34 postive |
| ELANE  | AC016596. 1 | 0. 5243086   | 5. 64E-20 postive |
| CASP1  | ZEB2-AS1    | 0. 516752427 | 2. 34E-19 postive |
| NLRC4  | ZEB2-AS1    | 0. 518487516 | 1. 69E-19 postive |

|        |              |             |          |         |
|--------|--------------|-------------|----------|---------|
| NLRP3  | AL731567.1   | 0.523512139 | 6.56E-20 | postive |
| PYCARD | AC079210.1   | 0.541647338 | 1.88E-21 | postive |
| NLRP3  | AC012181.1   | 0.522229784 | 8.37E-20 | postive |
| PYCARD | AC012360.2   | 0.576565357 | 1.06E-24 | postive |
| PYCARD | HMGAI1P4     | 0.573320537 | 2.21E-24 | postive |
| PYCARD | AP000238.1   | 0.517319064 | 2.10E-19 | postive |
| SCAF11 | LINC01719    | 0.574059029 | 1.87E-24 | postive |
| PYCARD | U62317.2     | 0.532923207 | 1.07E-20 | postive |
| IL18   | LINC00539    | 0.50091031  | 4.12E-18 | postive |
| PYCARD | AC011446.1   | 0.500587316 | 4.37E-18 | postive |
| GSDMA  | AL133342.1   | 0.518285933 | 1.76E-19 | postive |
| IL18   | AL133342.1   | 0.51282245  | 4.83E-19 | postive |
| NLRC4  | AL133342.1   | 0.512280544 | 5.34E-19 | postive |
| PYCARD | AL133342.1   | 0.601263088 | 3.04E-27 | postive |
| GSDMA  | MIR3945HG    | 0.527139853 | 3.28E-20 | postive |
| NLRP2  | Z73429.1     | 0.547064612 | 6.24E-22 | postive |
| IL18   | LINC02084    | 0.5266393   | 3.61E-20 | postive |
| IL1B   | AL138828.1   | 0.677208337 | 1.21E-36 | postive |
| CASP4  | AL031775.1   | 0.569108389 | 5.65E-24 | postive |
| NLRC4  | AL031775.1   | 0.644394857 | 2.96E-32 | postive |
| NLRC4  | AC087672.2   | 0.555416316 | 1.09E-22 | postive |
| PYCARD | AC087672.2   | 0.545498668 | 8.60E-22 | postive |
| NLRP3  | AC067945.2   | 0.501529129 | 3.70E-18 | postive |
| CASP1  | AC004865.2   | 0.585508935 | 1.35E-25 | postive |
| CASP4  | AC004865.2   | 0.519548085 | 1.39E-19 | postive |
| IL18   | AC004865.2   | 0.58273893  | 2.57E-25 | postive |
| NLRC4  | AC004865.2   | 0.568559891 | 6.38E-24 | postive |
| PYCARD | AC004865.2   | 0.588436075 | 6.78E-26 | postive |
| NLRP2  | AL133299.1   | 0.622173655 | 1.42E-29 | postive |
| NLRC4  | LINC01374    | 0.528194301 | 2.68E-20 | postive |
| PYCARD | LINC01374    | 0.532267207 | 1.21E-20 | postive |
| CASP1  | AC008105.3   | 0.507022876 | 1.39E-18 | postive |
| IL18   | AC008105.3   | 0.54663558  | 6.81E-22 | postive |
| NLRP3  | AC243960.3   | 0.530632741 | 1.67E-20 | postive |
| CASP1  | AL161785.1   | 0.57036726  | 4.28E-24 | postive |
| CASP5  | AL161785.1   | 0.525124077 | 4.83E-20 | postive |
| GSDMA  | AL161785.1   | 0.619791784 | 2.66E-29 | postive |
| IL18   | AL161785.1   | 0.577380044 | 8.82E-25 | postive |
| NLRC4  | AL161785.1   | 0.733887971 | 9.76E-46 | postive |
| NLRP3  | AL161785.1   | 0.655864575 | 1.00E-33 | postive |
| PYCARD | AL161785.1   | 0.628937554 | 2.28E-30 | postive |
| GSDMA  | AC243829.4   | 0.616845154 | 5.78E-29 | postive |
| GSDMC  | AC243829.4   | 0.579771499 | 5.11E-25 | postive |
| CASP1  | AL023653.1   | 0.582911113 | 2.47E-25 | postive |
| IL18   | AL023653.1   | 0.693257135 | 5.28E-39 | postive |
| CASP5  | LINC02828    | 0.554643581 | 1.29E-22 | postive |
| GSDMA  | LINC02828    | 0.571722809 | 3.16E-24 | postive |
| NLRC4  | LINC02828    | 0.539456177 | 2.92E-21 | postive |
| PYCARD | LINC02828    | 0.507374886 | 1.30E-18 | postive |
| NLRC4  | LINC01094    | 0.526323044 | 3.84E-20 | postive |
| NLRP3  | LINC01094    | 0.548051582 | 5.09E-22 | postive |
| IL1B   | AC092598.1   | 0.603047031 | 1.95E-27 | postive |
| PYCARD | AC016876.3   | 0.528319169 | 2.61E-20 | postive |
| CASP1  | HLA-DQB1-AS1 | 0.511198859 | 6.51E-19 | postive |

**Table S3:** List of 809 differentially expressed immune-related lncRNAs between high-risk and low-risk groups in OS signature.



| gene      | logFC        | pValue      | fdr      |
|-----------|--------------|-------------|----------|
| EMILIN3   | 1.408409549  | 1.63E-07    | 3.96E-06 |
| TBC1D10C  | -1.049947832 | 7.77E-14    | 2.43E-11 |
| LRRN1     | 1.060915857  | 4.44E-07    | 9.34E-06 |
| IGKV1-6   | -1.400873585 | 2.39E-09    | 1.03E-07 |
| SLAMF7    | -1.287858195 | 3.52E-13    | 7.24E-11 |
| CILP2     | 1.095525464  | 7.33E-06    | 0.000103 |
| IGLV1-47  | -1.126616638 | 4.60E-08    | 1.31E-06 |
| S1PR4     | -1.03507634  | 1.42E-15    | 2.06E-12 |
| CXCR3     | -1.394432627 | 6.57E-16    | 1.27E-12 |
| CD8A      | -1.079972482 | 1.61E-11    | 1.41E-09 |
| IGHV1-18  | -1.109333693 | 3.28E-07    | 7.20E-06 |
| IGLL5     | -1.181111635 | 2.68E-09    | 1.11E-07 |
| IGKV3-15  | -1.068215163 | 1.60E-07    | 3.91E-06 |
| IGHM      | -1.06437717  | 1.20E-10    | 7.37E-09 |
| DLK1      | 1.768913163  | 4.20E-06    | 6.57E-05 |
| IGHV1-46  | -1.226549817 | 4.29E-07    | 9.06E-06 |
| FGFR3     | 1.134993295  | 4.42E-07    | 9.32E-06 |
| IGHV4-34  | -1.075734051 | 3.73E-08    | 1.09E-06 |
| IGLV3-1   | -1.055810816 | 9.35E-07    | 1.77E-05 |
| CD5       | -1.165384655 | 5.89E-15    | 3.59E-12 |
| TRBV28    | -1.183425698 | 1.81E-15    | 2.29E-12 |
| CD3D      | -1.092871205 | 1.61E-14    | 7.84E-12 |
| SIT1      | -1.156466649 | 2.94E-15    | 2.83E-12 |
| IGHV3-23  | -1.097121465 | 4.56E-09    | 1.72E-07 |
| IGLV3-19  | -1.159162949 | 2.48E-07    | 5.70E-06 |
| LTB       | -1.010071787 | 2.82E-16    | 1.26E-12 |
| PTPN7     | -1.026922233 | 4.11E-12    | 4.71E-10 |
| CD8B      | -1.310045485 | 1.29E-13    | 3.26E-11 |
| DPYSL4    | 1.102188803  | 5.10E-08    | 1.43E-06 |
| IGHV1-24  | -1.396012852 | 5.63E-06    | 8.21E-05 |
| IGLV2-23  | -1.050297054 | 8.17E-07    | 1.58E-05 |
| COL9A3    | 1.518539477  | 3.07E-05    | 0.000351 |
| IGKV4-1   | -1.068456212 | 8.80E-08    | 2.33E-06 |
| SLAMF6    | -1.136911666 | 9.03E-13    | 1.43E-10 |
| ITGAL     | -1.003855135 | 6.57E-16    | 1.27E-12 |
| IGHV5-51  | -1.068349589 | 1.50E-08    | 4.92E-07 |
| IGLV4-69  | -1.061572585 | 1.15E-06    | 2.12E-05 |
| ETV7      | -1.047089642 | 5.66E-14    | 1.87E-11 |
| IGHGP     | -1.13091107  | 1.69E-08    | 5.44E-07 |
| IGLV1-44  | -1.204281823 | 4.27E-09    | 1.64E-07 |
| CD3E      | -1.044188126 | 2.28E-14    | 9.76E-12 |
| LINC01871 | -1.093670281 | 7.71E-11    | 5.06E-09 |
| IGHV3-21  | -1.135914284 | 1.03E-07    | 2.67E-06 |
| IGLV3-10  | -1.096500121 | 2.27E-06    | 3.90E-05 |
| CXCL11    | -1.109801839 | 1.49E-11    | 1.35E-09 |
| IGLV2-11  | -1.056463905 | 2.89E-06    | 4.82E-05 |
| NAPSB     | -1.062500562 | 1.55E-13    | 3.82E-11 |
| CD27      | -1.084580366 | 5.00E-13    | 9.49E-11 |
| IGKV1-16  | -1.211334686 | 1.67E-06    | 2.93E-05 |
| CCR5      | -1.089429813 | 3.93E-14    | 1.52E-11 |
| IGLV2-8   | -1.206256617 | 3.80E-08    | 1.11E-06 |
| IGHV4-39  | -1.047181241 | 5.35E-07    | 1.10E-05 |
| GZMH      | -1.157349867 | 4.15E-15    | 2.86E-12 |
| MDFI      | 1.119330798  | 1.25E-08    | 4.21E-07 |
| SNX20     | -1.088634042 | 4.79E-14    | 1.74E-11 |
| IGHV3-15  | -1.158753883 | 3.31E-07    | 7.25E-06 |
| ADAMDEC1  | -1.278157257 | 4.59E-10    | 2.35E-08 |
| IGLV3-25  | -1.174216743 | 6.55E-08    | 1.80E-06 |
| CRABP1    | 1.69158865   | 6.44E-05    | 0.000647 |
| CD2       | -1.047747285 | 8.14E-15    | 4.28E-12 |
| IGHV3-11  | -1.168890467 | 1.96E-07    | 4.64E-06 |
| GZMK      | -1.159678945 | 5.09E-13    | 9.50E-11 |
| IGHV3-30  | -1.101877384 | 1.29E-06    | 2.34E-05 |
| MEX3A     | 1.037048392  | 5.28E-09    | 1.96E-07 |
| LCK       | -1.162428121 | 4.18E-16    | 1.26E-12 |
| IGLV6-57  | -1.095846192 | 7.40E-06    | 0.000104 |
| GBP5      | -1.0544619   | 1.73E-11    | 1.48E-09 |
| CRLF1     | 1.055626755  | 0.00020386  | 0.001684 |
| IGKV1-9   | -1.041304122 | 2.82E-06    | 4.72E-05 |
| IGHV1-69D | -1.219709265 | 2.76E-09    | 1.13E-07 |
| P2RY13    | -1.084817266 | 1.15E-13    | 3.09E-11 |
| IGHV3-33  | -1.04205247  | 7.48E-08    | 2.02E-06 |
| IGKV1-17  | -1.086744479 | 1.18E-05    | 0.000156 |
| ANKRD22   | -1.255142898 | 1.60E-10    | 9.39E-09 |
| SCX       | 1.000224158  | 2.52E-06    | 4.26E-05 |
| RFLNA     | 1.035759378  | 0.000521405 | 0.00362  |
